# Supplementary material
Source: PubMed Central journal article supplement (PMC7340171)
Supplement: NIHMS1602858-supplement-SupplmInfo_MouapiMaurer.pdf [file NIHMS1602858-supplement-SupplmInfo_MouapiMaurer.pdf]

## Supplementary Information

Evaluating the Effects of Fibrinogen  $\alpha$ C Mutations on the Ability of Factor XIII to Crosslink the Reactive  $\alpha$ C Glutamines (Q237, Q328, Q366)

Kelly Njine Mouapi<sup>1</sup>, Lucille J. Wagner<sup>1</sup>, Chad A. Stephens<sup>1</sup>, Mohammed M. Hindi<sup>1</sup>, Daniel W. Wilkey<sup>2</sup>, Michael L. Merchant<sup>2</sup>, and Muriel C Maurer<sup>1\*</sup>

<sup>1</sup>Chemistry Department, University of Louisville, Louisville, KY 40292

<sup>2</sup>Division of Nephrology and Hypertension, Department of Medicine, University of Louisville, KY 40202

Supplementary Table S1:

Primers used to introduce single amino acid substitutions into Fibrinogen  $\alpha$ C (233-425)

| Mutation | Forward Primer 5'-3'                           | Reverse Primer 5'-3'                      |
|----------|------------------------------------------------|-------------------------------------------|
| E396A    | CTGGGGCACATTTGAAGCGGT<br>GAGGAAATG             | CATTTCTGACACCGCTTCA<br>AATGTGCCCCAGTCTGG  |
| Q237N    | GGATCCACAGACATGCCGAAC<br>ATGAGTGGAAGGCATTAACAG | ATGCCTTCCACTCATGTTTCG<br>GCATGTCTGTGGATCC |

Supplementary Table S2:

Sequence and mass of proteolytically derived peptides containing  $\alpha$ C Q237, Q328, and Q366

| Reactive Glutamine | Amino Acid Sequence                    | Theor $m/z$ | Exptl $m/z$ | Digest       |
|--------------------|----------------------------------------|-------------|-------------|--------------|
| Q237 <sup>a</sup>  | <i>GPLGSTDMPQMRME</i>                  | 1549.7      | 1550        | GluC         |
| Q237N              | <i>GPLGSTDMPNMRME</i>                  | 1535.5      | 1535        | Gluc         |
| Q328               | <i>NSGSSGTGSTGNQNPGRPRP<br/>GSTGTW</i> | 2448.1      | 2448        | Chymotrypsin |
| Q366               | <i>SSVSGSTGQWHSE</i>                   | 1348.6      | 1349        | GluC         |
| E396               | <i>SGSFRPDSPGSGNARPNNPDWGTFEE</i>      | 2778.2      | 2778        | GluC         |
| E396A <sup>b</sup> | <i>SGSFRPDSPGSGNARPNNPDWGTFE</i>       | 2649        | 2648        | GluC         |

<sup>a</sup>MS/MS analysis on the peptide containing Q237 revealed that amino acids GPLGS are located just N-terminal to the  $\alpha$ C 233-425. These amino acids remain following PreScission (human rhinovirus 3C) protease cleavage of the GST- $\alpha$ C (233-425). The sequences containing Q328 and Q366 were readily identified using a theoretical protease digest (Protein Prospector UCSF).

<sup>b</sup>With the E396A mutation, the GluC cleavage site shifts from E396 to E395.

Supplementary Table S3:

Average retention times and  $m/z$  values for peptide fragments containing reactive glutamines analyzed by LC-MS

| Reactive Glutamine monitored | Average retention time (min) | $m/z +1$  | $m/z +2$  | $m/z +3$ |
|------------------------------|------------------------------|-----------|-----------|----------|
| Q237                         | 19.4                         | 1549.6807 | 775.3440  | 517.2318 |
| Q237-GEE                     | 22.1                         | 1635.7175 | 818.3624  | 545.9107 |
| Q328                         | 12.7                         | 2448.0770 | 1224.5422 | 816.6972 |
| Q328-GEE                     | 18.3                         | 2534.1138 | 1267.5606 | 845.3761 |
| Q366                         | 9.7                          | 1348.5764 | 674.7918  | 450.1970 |
| Q366-GEE                     | 13.5                         | 1434.6132 | 717.8102  | 478.8759 |
